# Supplementary material
Source: JCI journal article supplement (doi:10.1172/jci203997)

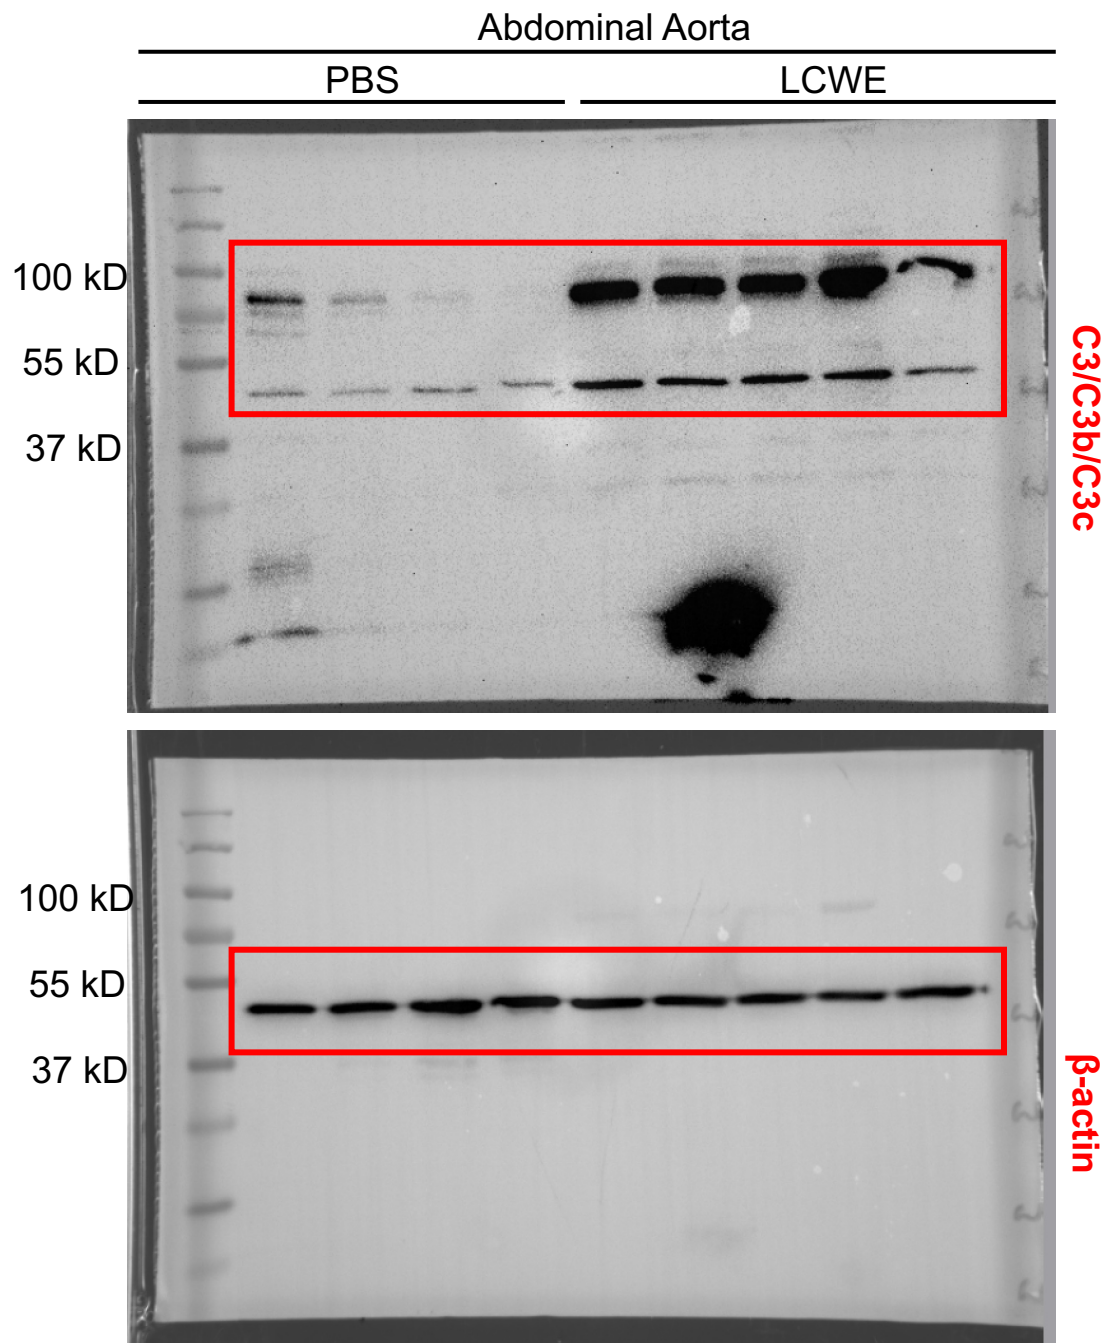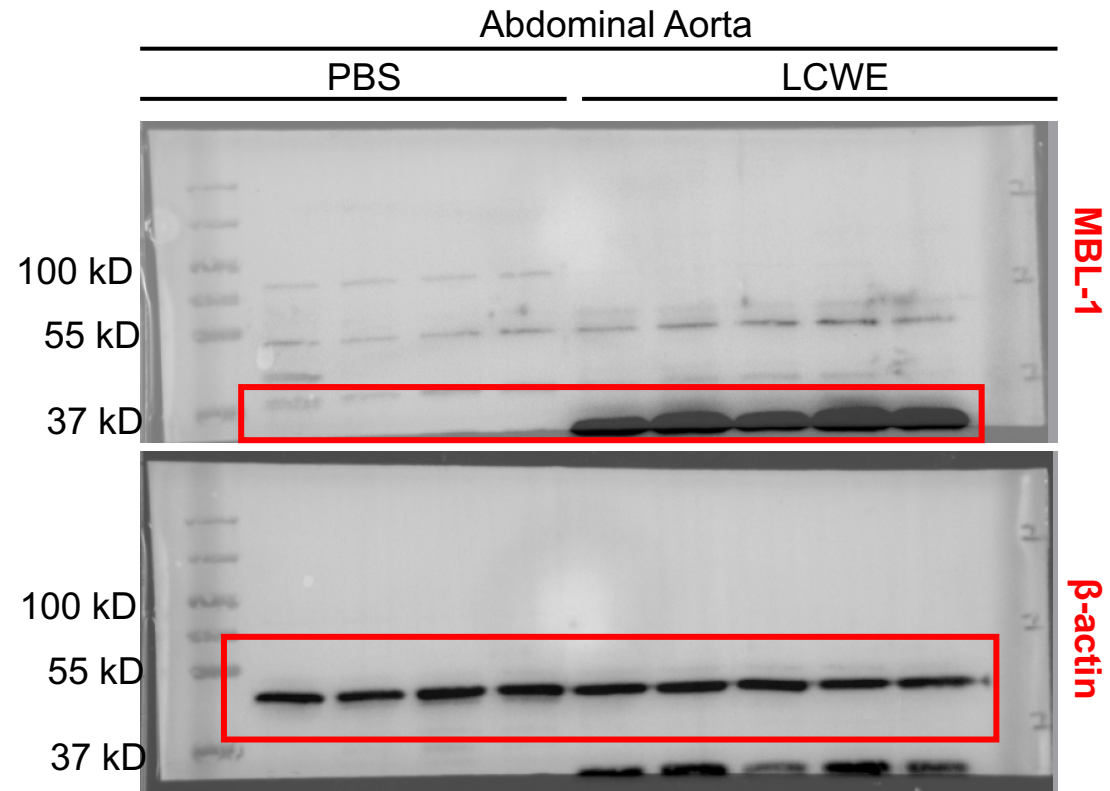

Full unedited gels for Figure S3A

Supplement: sd1 [file 1]
